# Supplementary material
Source: PubMed Central journal article supplement (PMC3311749)

**Figure S1. Thymidine incorporation by proliferating NK cells stimulated with IL-15.** B6 splenocytes ( $1 \times 10^5$  cells/well) were incubated in media containing a range of IL-15 concentrations in triplicate. After 48 h,  $^3\text{H}$ -thymidine ( $0.4 \mu\text{Ci/well}$ ; Perkin-Elmer, MA) was added. After an additional 24 h, splenocytes were harvested onto filter mats (Tomtec, CT).  $^3\text{H}$ -thymidine incorporation was measured in a liquid scintillation counter (Wallac, MD). The maximal thymidine incorporation was determined, and the thymidine incorporation levels for different IL-15 concentrations were depicted as a percentage of the maximal response. Empty and filled squares represent results from two independent proliferation experiments.

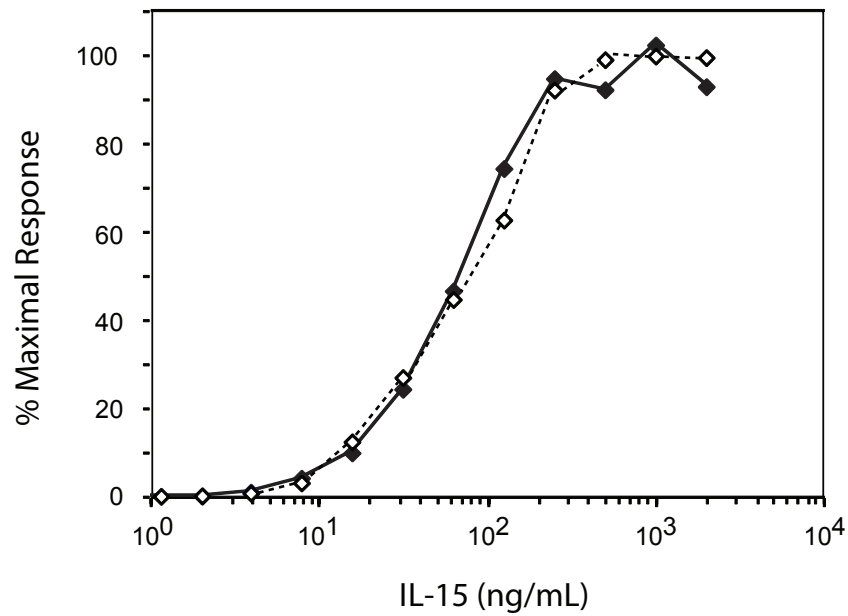

Supplement: NIHMS351681-supplement-1.pdf [file NIHMS351681-supplement-1.pdf]
