# Supplementary material
Source: PubMed Central journal article supplement (PMC3311749)
Supplement: NIHMS351681-supplement-2.pdf [file NIHMS351681-supplement-2.pdf]

**Figure S2. Alternative estimates of NK cell death rates based on direct enumeration of 7-aminoactinomycin (7-AAD)+ NK cells.** NK cell-enriched splenocytes were incubated in specific concentrations of IL-15 for various lengths of time. Prior to flow cytometer analysis, 7-AAD was added to the NK cells for 10 minutes. *A*, Cell fragments were excluded from analysis of the lymphocytes on the side scatter vs. forward scatter plot. *B*, Dead NK cells were identified as NK1.1<sup>+</sup> 7-AAD<sup>+</sup> lymphocytes. (FL3 also contained CD3<sup>+</sup> splenocytes; however, dual positive NK1.1+CD3+ splenocytes were negligible after NK cell negative selection as well as in parallel staining of NK cell-enriched splenocytes without the addition of 7-AAD). *C and E*, Dead NK cells were enumerated at various time-points using calibration beads and plotted on a semi-log scale. The slope (determined by linear regression) provided an estimate of the overall death rate and is shown for NK cells stimulated with IL-15 concentrations of 25 ng/ml (*C*) or 75 ng/ml (*E*). *D and F*, The dead cell data for NK cells stimulated with IL-15 concentrations of 25 ng/ml (*D*) or 75 ng/ml (*F*) was divided into early (<48 h) and late (>48 h) subsets (based on Fig. 3F), and slopes for each group were calculated to allow death rate comparisons with  $d_U$  and  $d_D$ . Data shown are representative of three independent experiments. *G*, Comparison of NK cell death rates estimated by mathematical analysis or direct enumeration of 7-aminoactinomycin+ NK cells. The parameters  $d$ ,  $d_U$  and  $d_D$  represent overall death rate, death rate of compartment U cells, and death rate of compartment D cells, respectively. Model estimates represent values obtained through mathematical analysis (see Results section). Average values and standard deviations are shown for 3 independent experiments at each IL-15 concentration.

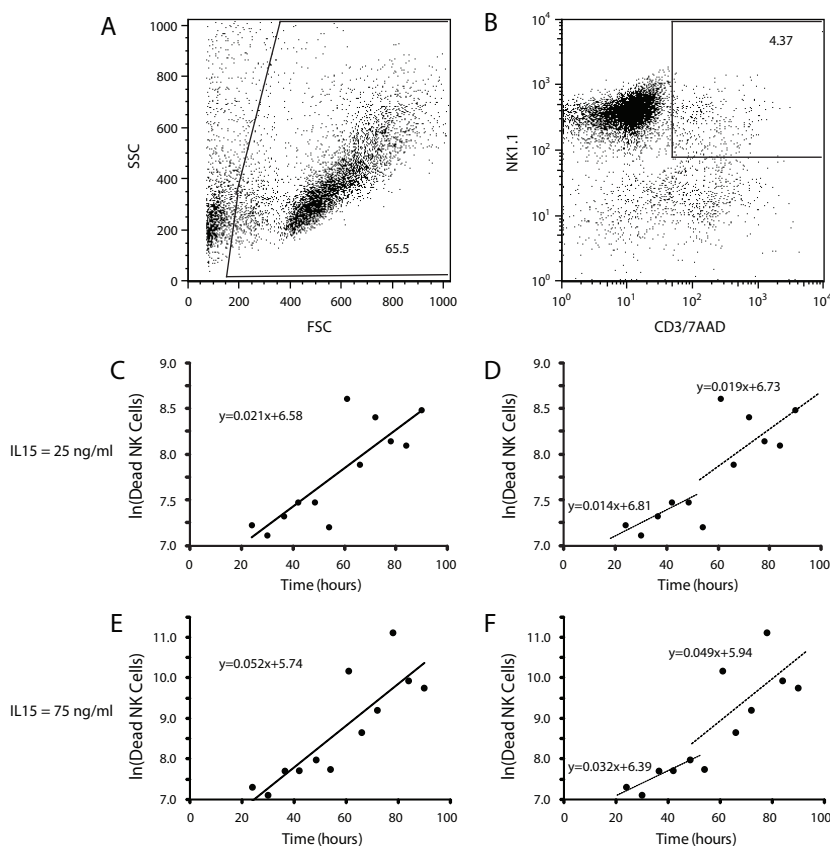

**G**

|                      |          | IL-15 = 25 ng/ml |                   | IL-15 = 75 ng/ml |                   |
|----------------------|----------|------------------|-------------------|------------------|-------------------|
|                      |          | Model Estimate   | 7-AAD measurement | Model Estimate   | 7-AAD measurement |
| $d \times 10^{-2}$   | $h^{-1}$ |                  | $1.9 \pm 0.67$    |                  | $3.6 \pm 1.6$     |
| $d_U \times 10^{-2}$ | $h^{-1}$ | $0.69 \pm 0.49$  | $1.2 \pm 0.59$    | $1.2 \pm 0.39$   | $2.1 \pm 2.0$     |
| $d_D \times 10^{-2}$ | $h^{-1}$ | $2.4 \pm 1.6$    | $2.1 \pm 0.95$    | $4.0 \pm 0.72$   | $3.3 \pm 1.8$     |
