# Supplementary material
Source: PubMed Central journal article supplement (PMC3311749)

**Figure S4. Experimental cell density did not alter the ability of the model to predict NK cell expansion.** Experiments with NK cell-enriched splenocytes (45-55% NK cells) were performed combining triplicate wells containing 25,000 NK cells/well (45,000 -56,000 total cells/well). See Figs. 4 and 6. The experiments were repeated with unenriched splenocytes (containing approximately 2% NK cells) with 2000 NK cells/well (100,000 total cells/well). Utilizing parameter estimates of recruitment, proliferation, and death rates from Table 1 (derived from NK cell-enriched splenocytes), predictions of NK cell proliferation from model 3 (solid curve) compared well with experimental results with unenriched splenocytes (filled circles; IL-15 = 25 ng/ml). Therefore, cell density (and other physical constraints within the limited volume of the cell well) did not appear to significantly influence the overall NK cell expansion in our *in vitro* experiments. Furthermore, the estimated values of  $d_U$  and  $d_D$  derived from experiments with unenriched splenocytes stimulated with 25 ng/ml IL-15 ( $0.4 \times 10^{-2} \text{ h}^{-1}$  and  $2.8 \times 10^{-2} \text{ h}^{-1}$ , respectively) were comparable with values ( $d_U 0.7 \times 10^{-2} \text{ h}^{-1}$  and  $d_D 2.4 \times 10^{-2} \text{ h}^{-1}$ ; Table 2) calculated from experiments with enriched NK cells, supporting our conclusion that replicating NK cells have a higher death rate than quiescent NK cells.

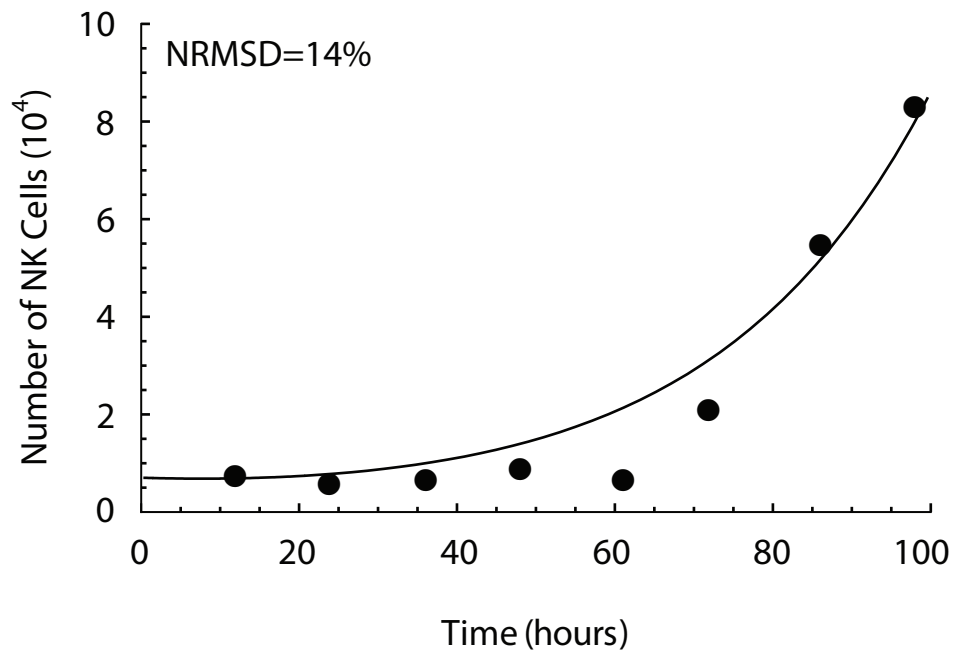

Supplement: NIHMS351681-supplement-4.pdf [file NIHMS351681-supplement-4.pdf]
